# Supplementary material for: Functional outcome is tied to dynamic brain states after mild to moderate traumatic brain injury
Source: PubMed Central journal article supplement — Hum Brain Mapp. 2019 Oct 21;41(3):617–31. doi: 10.1002/hbm.24827 (PMC7268079; doi:10.1002/hbm.24827), 2019-10-21

### ICR First Visit State 1

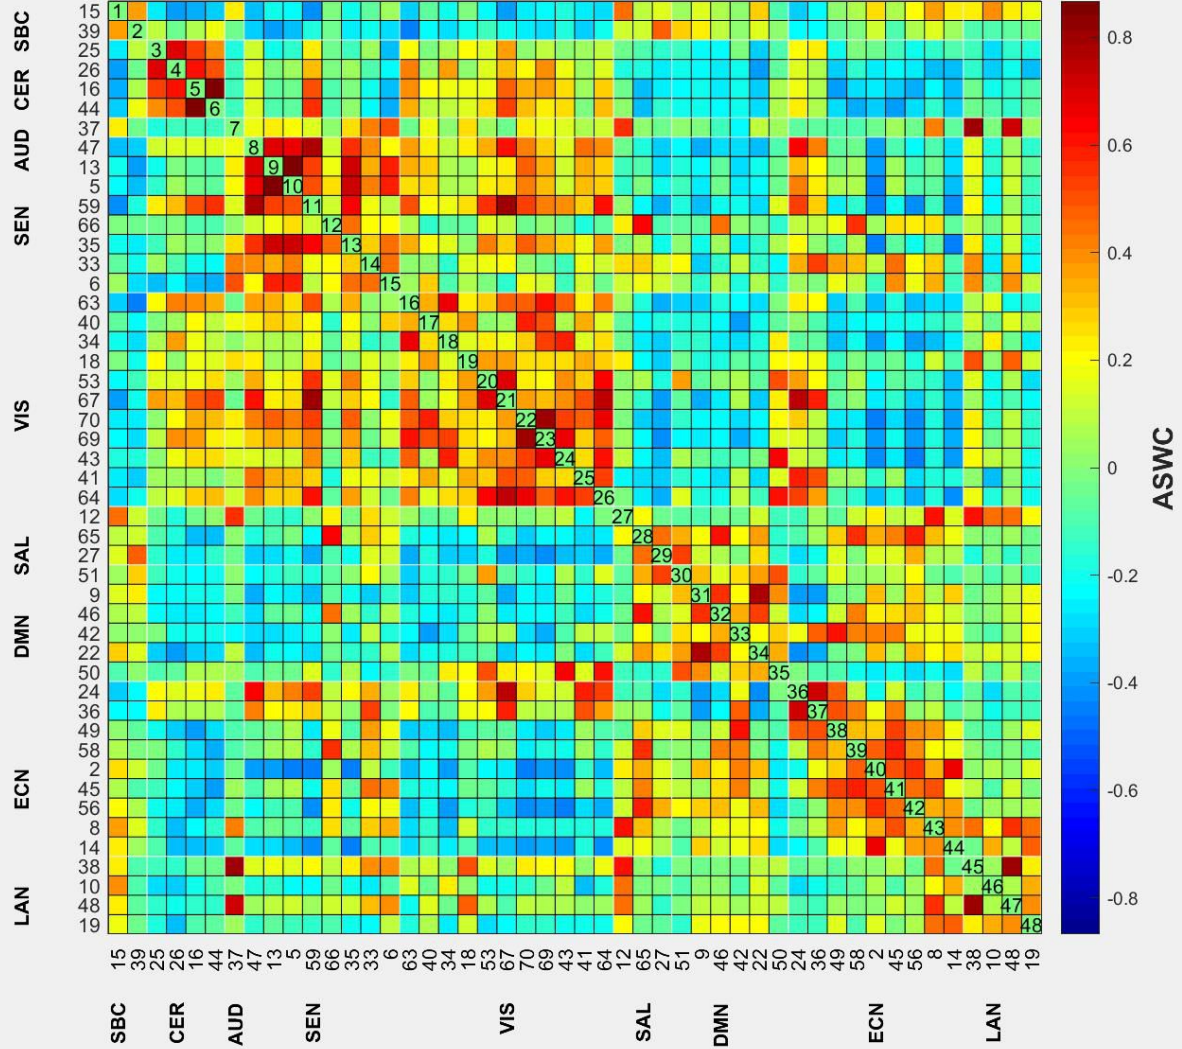





### ICR First Visit State 2

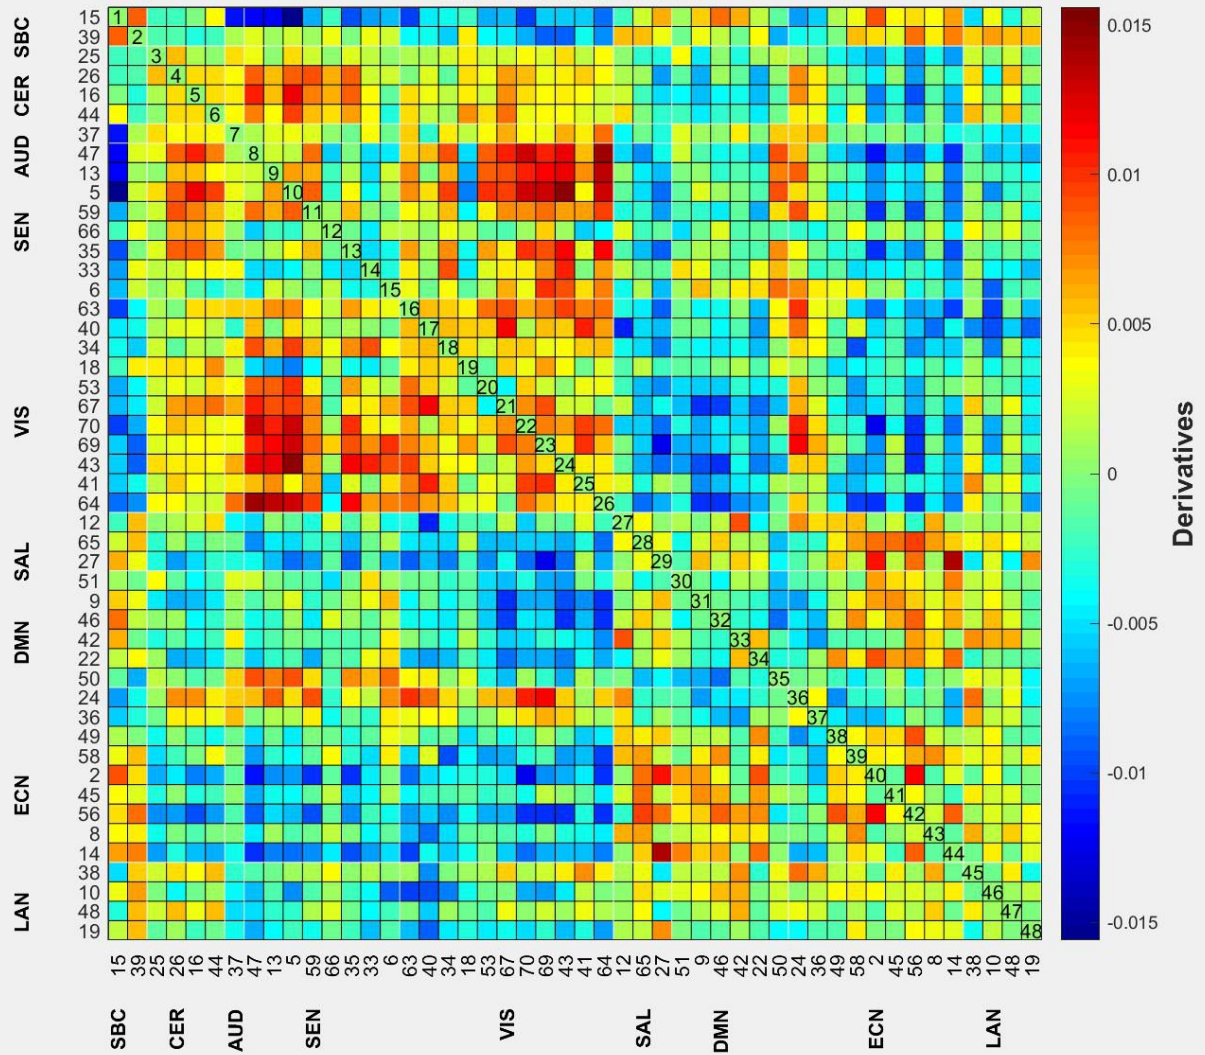

### ICR First Visit State 3

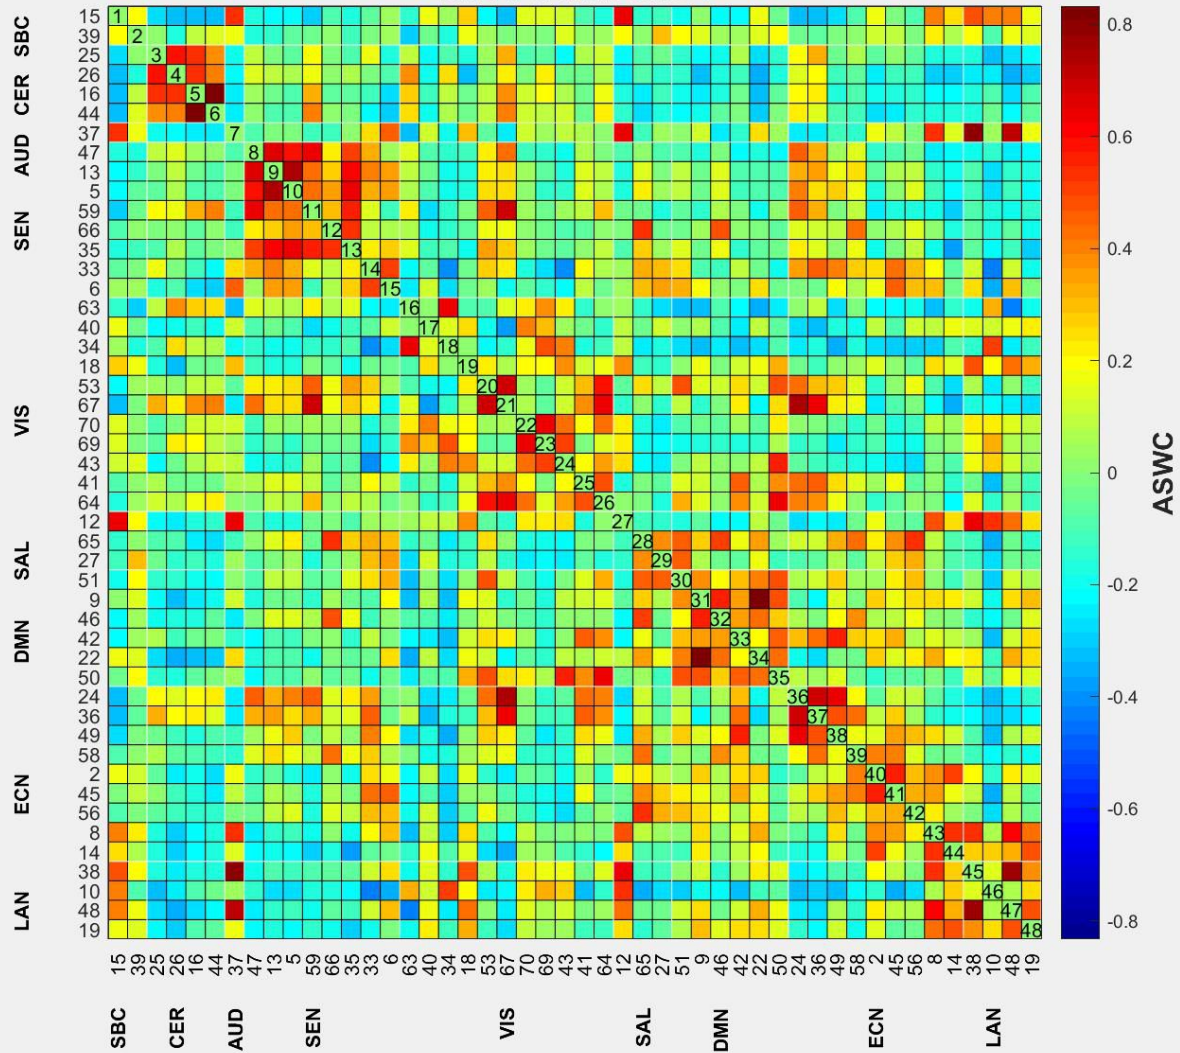



### ICR First Visit State 4

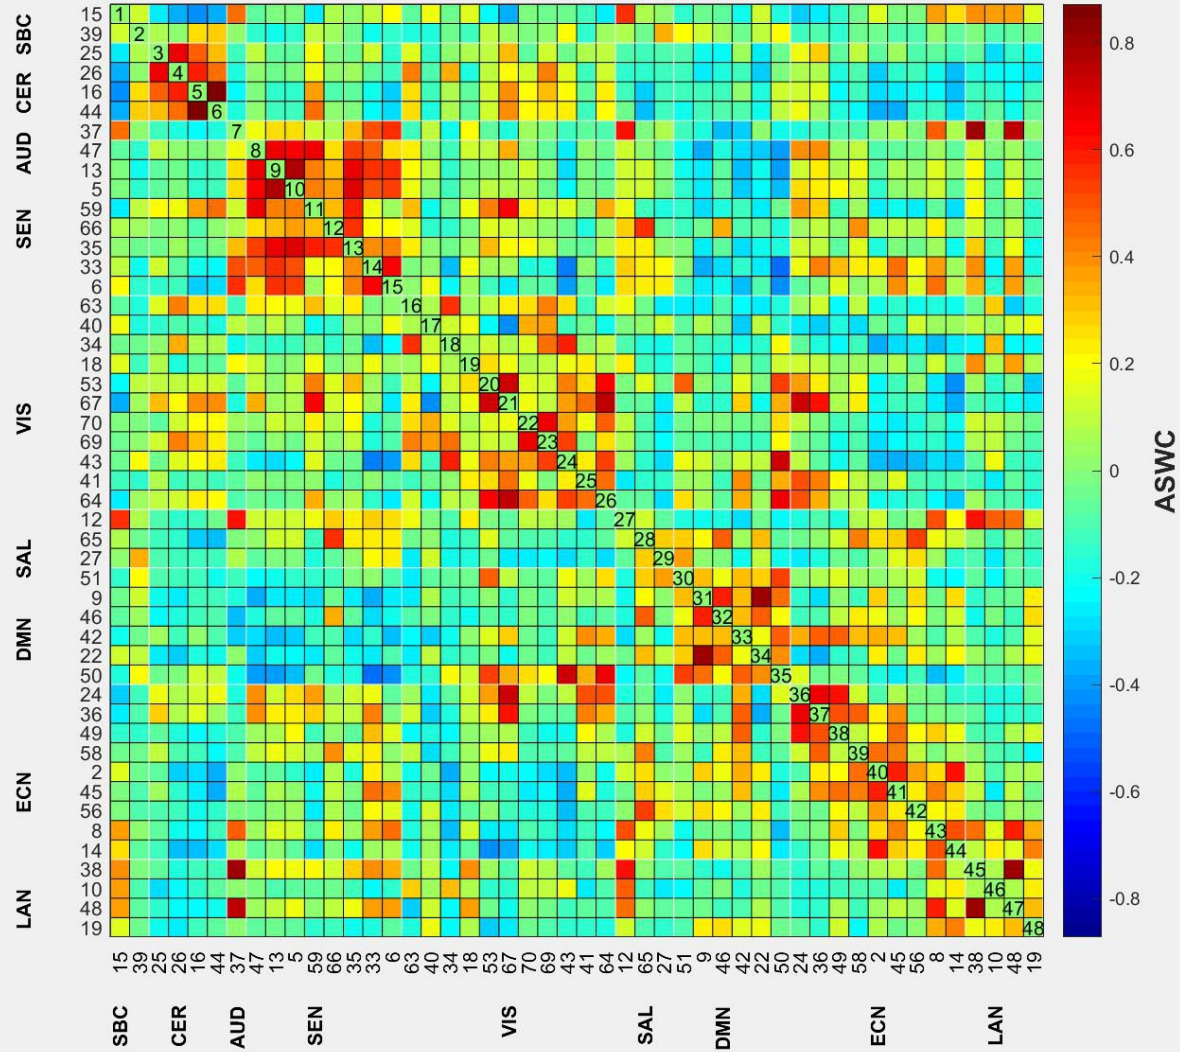







### ICR First Visit State 5

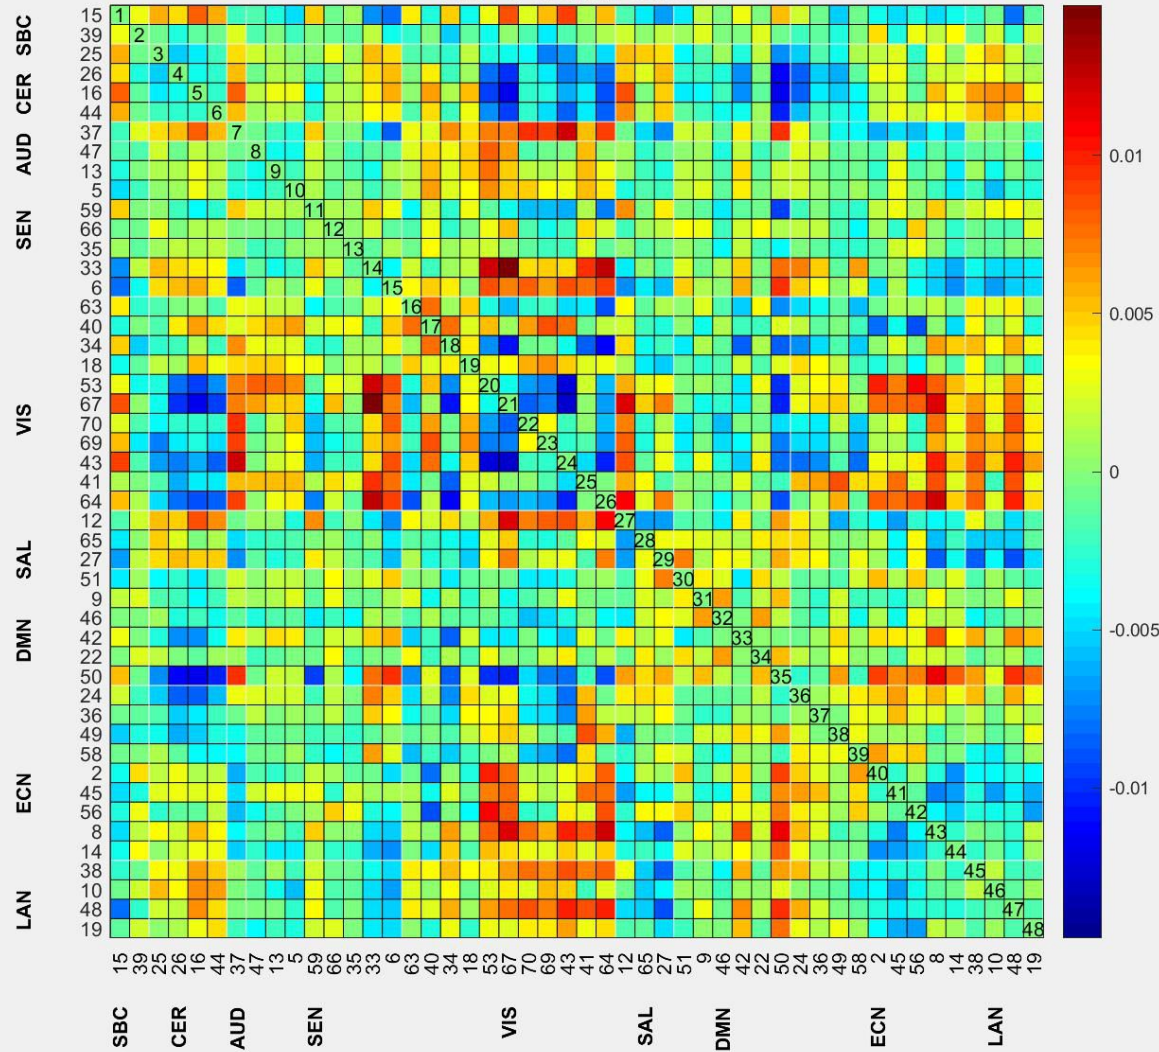











ICR Second Visit State 3

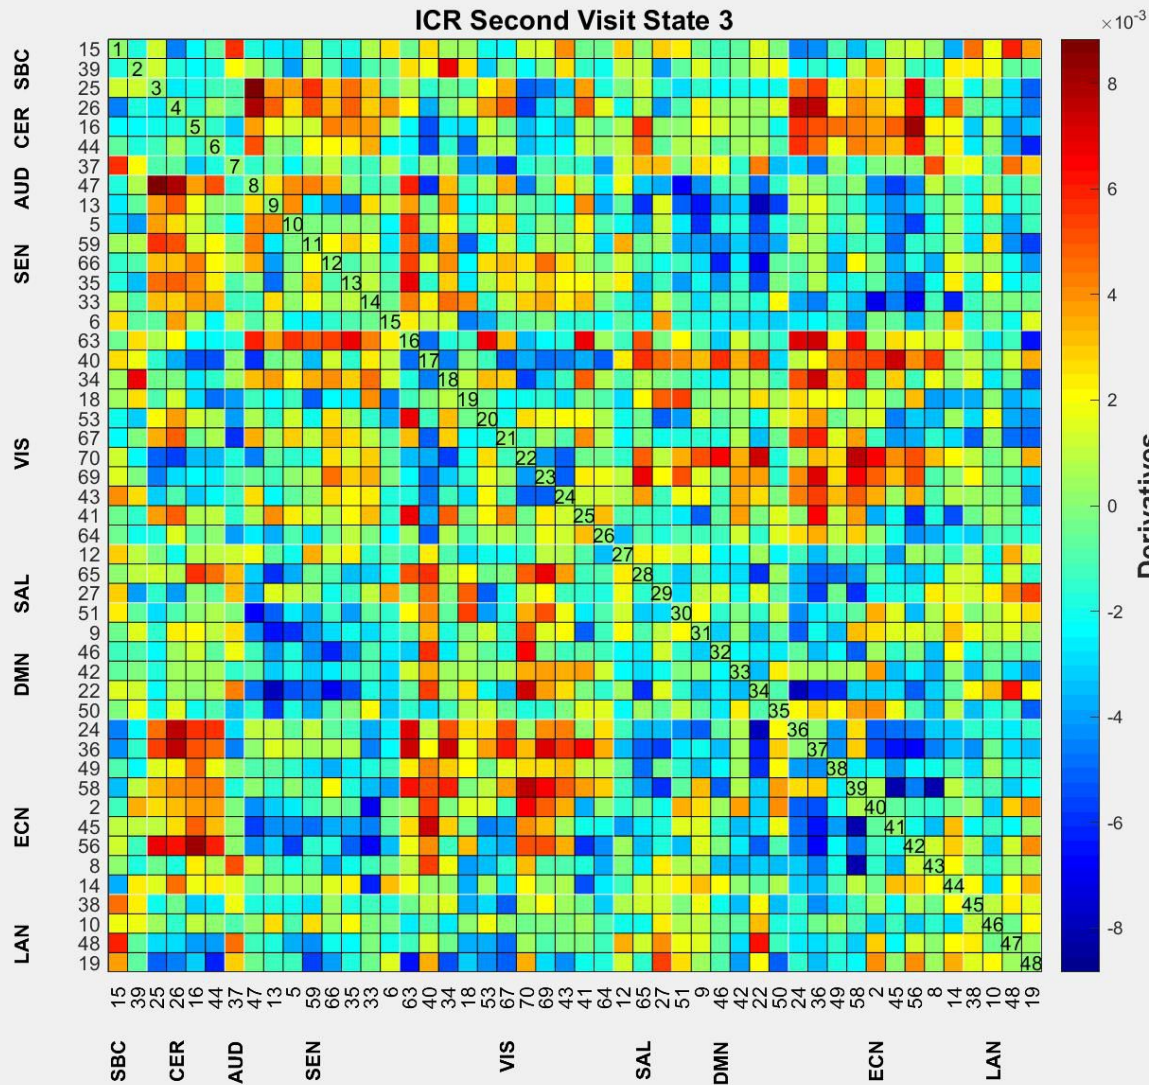





### ICR Second Visit State 4

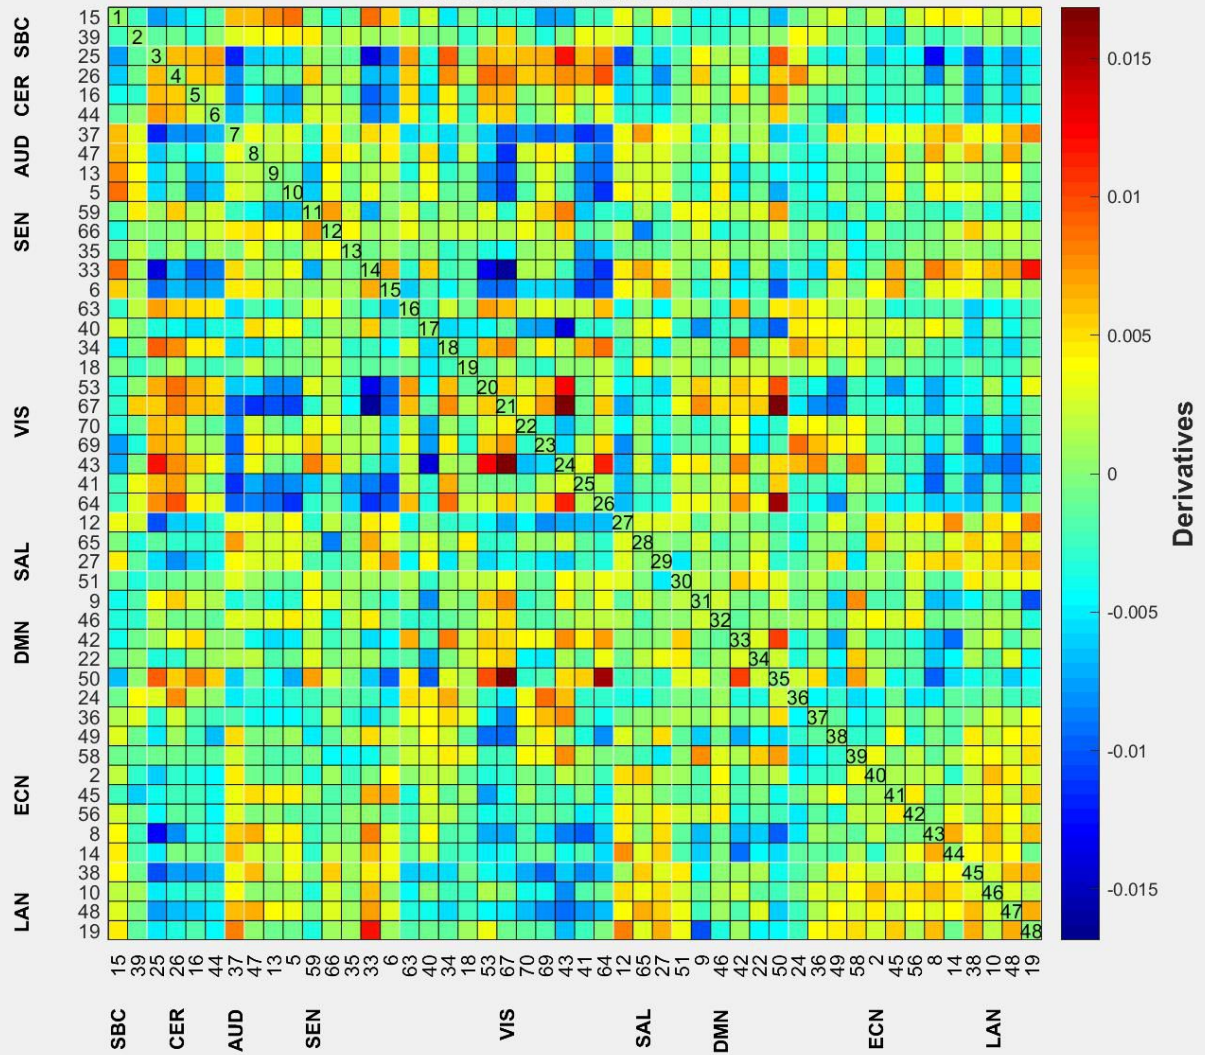



### ICR Second Visit State 5

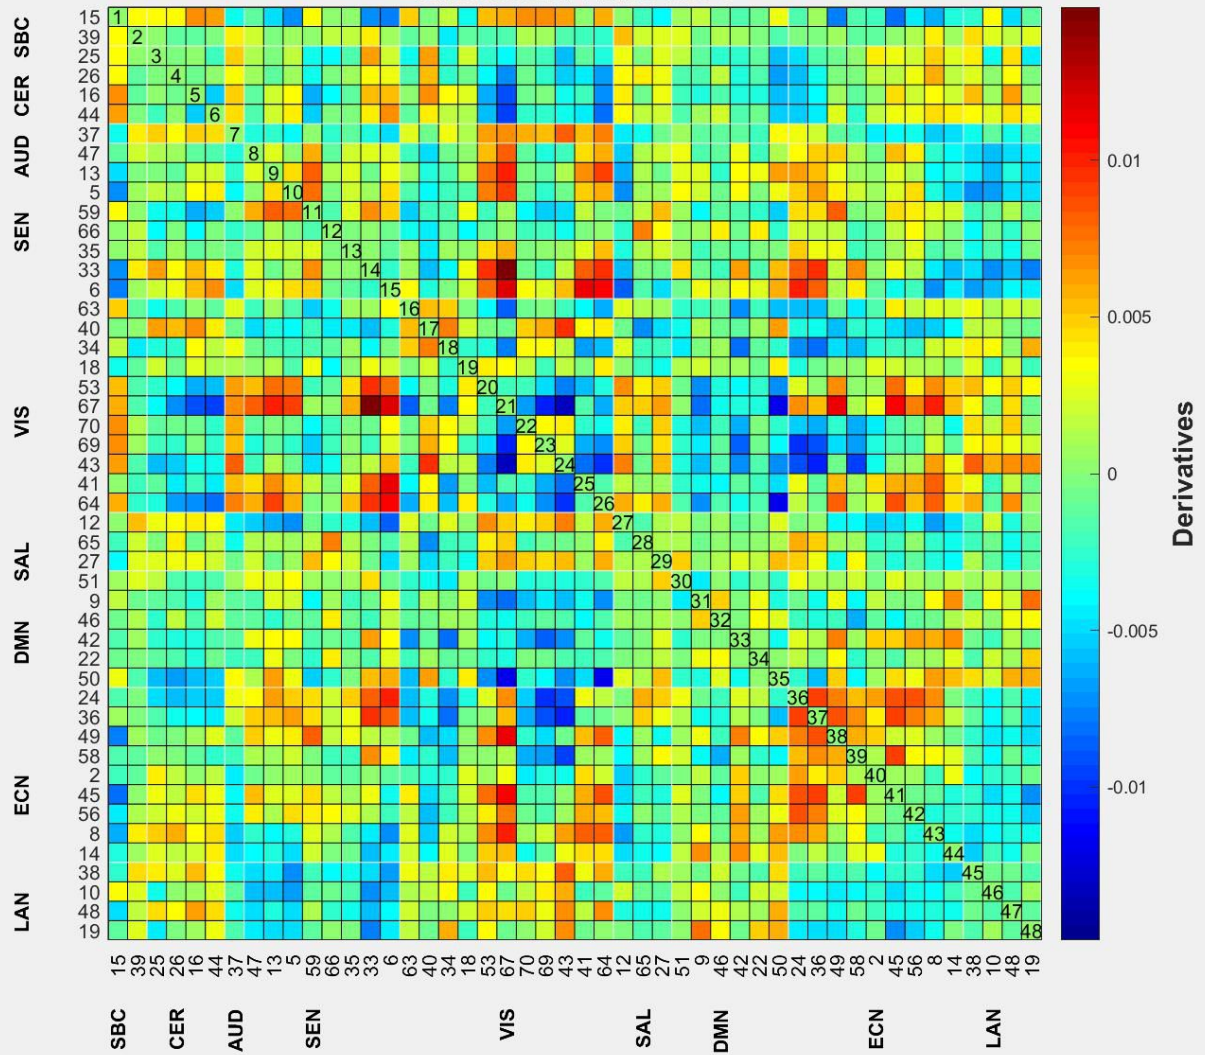

CR First Visit State 1

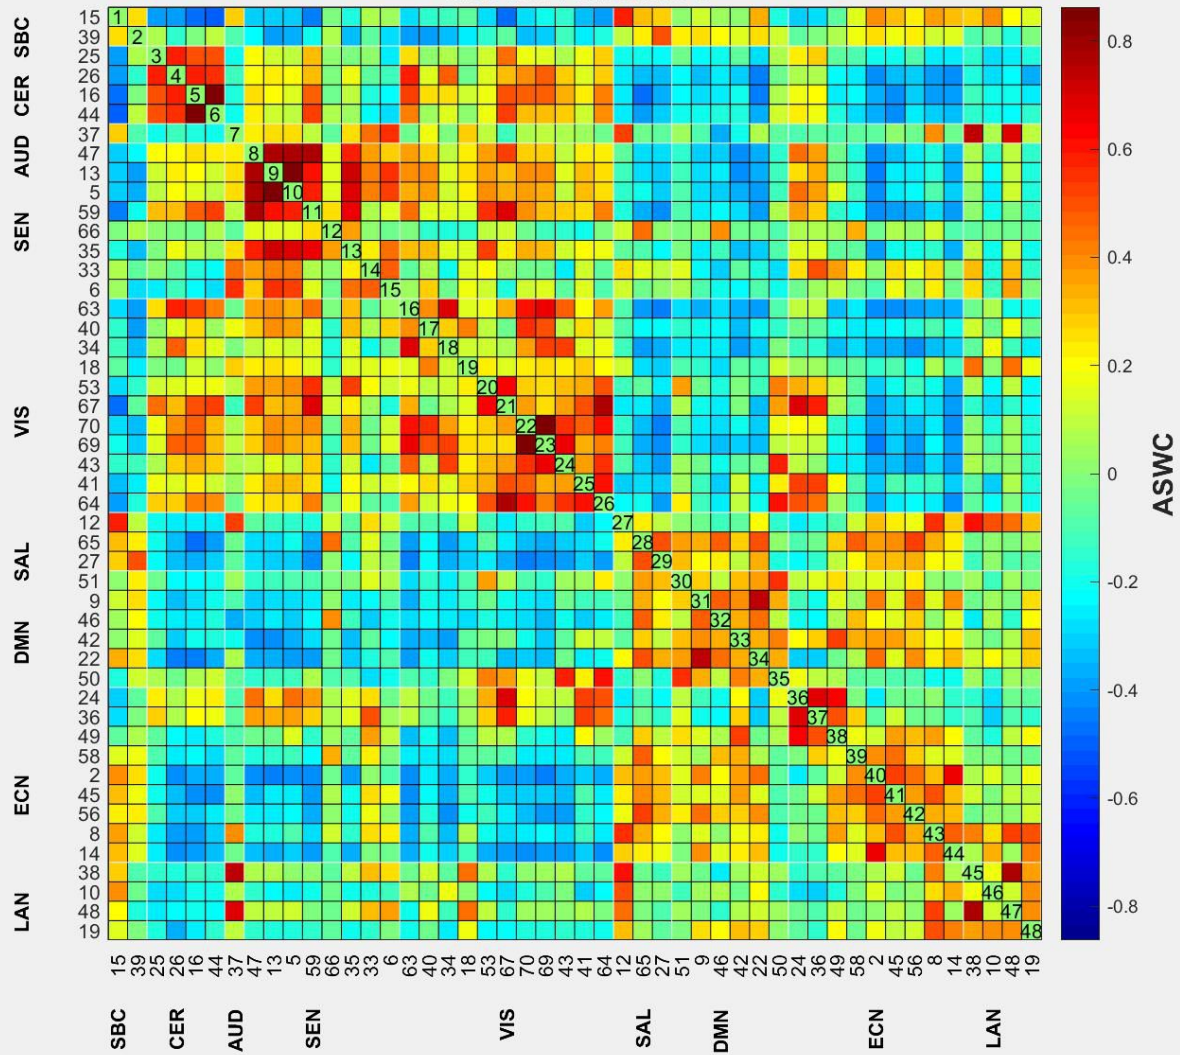



### CR First Visit State 2

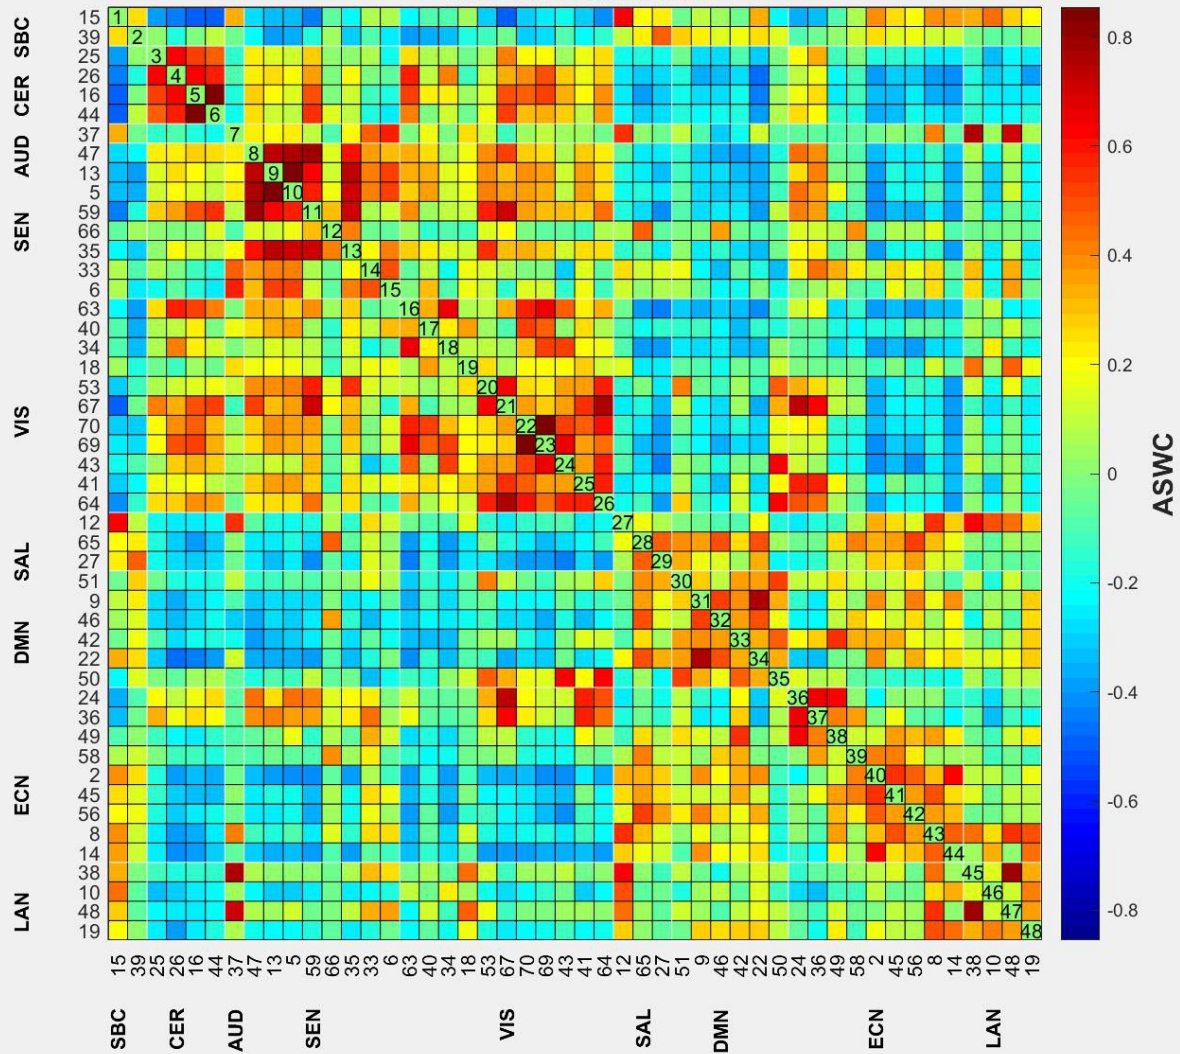

















### CR Second Visit State 1

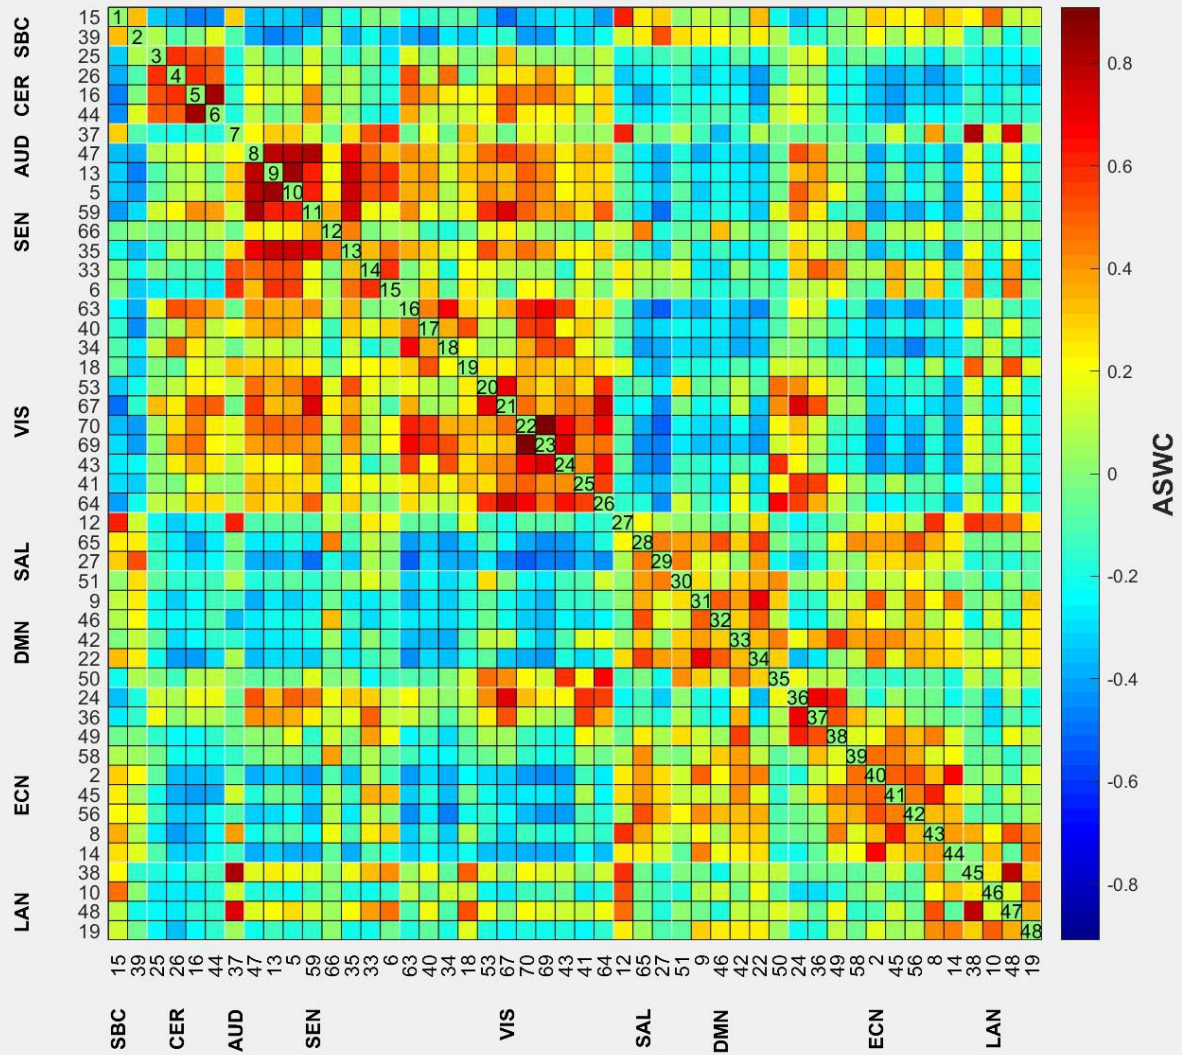









CR Second Visit State 3

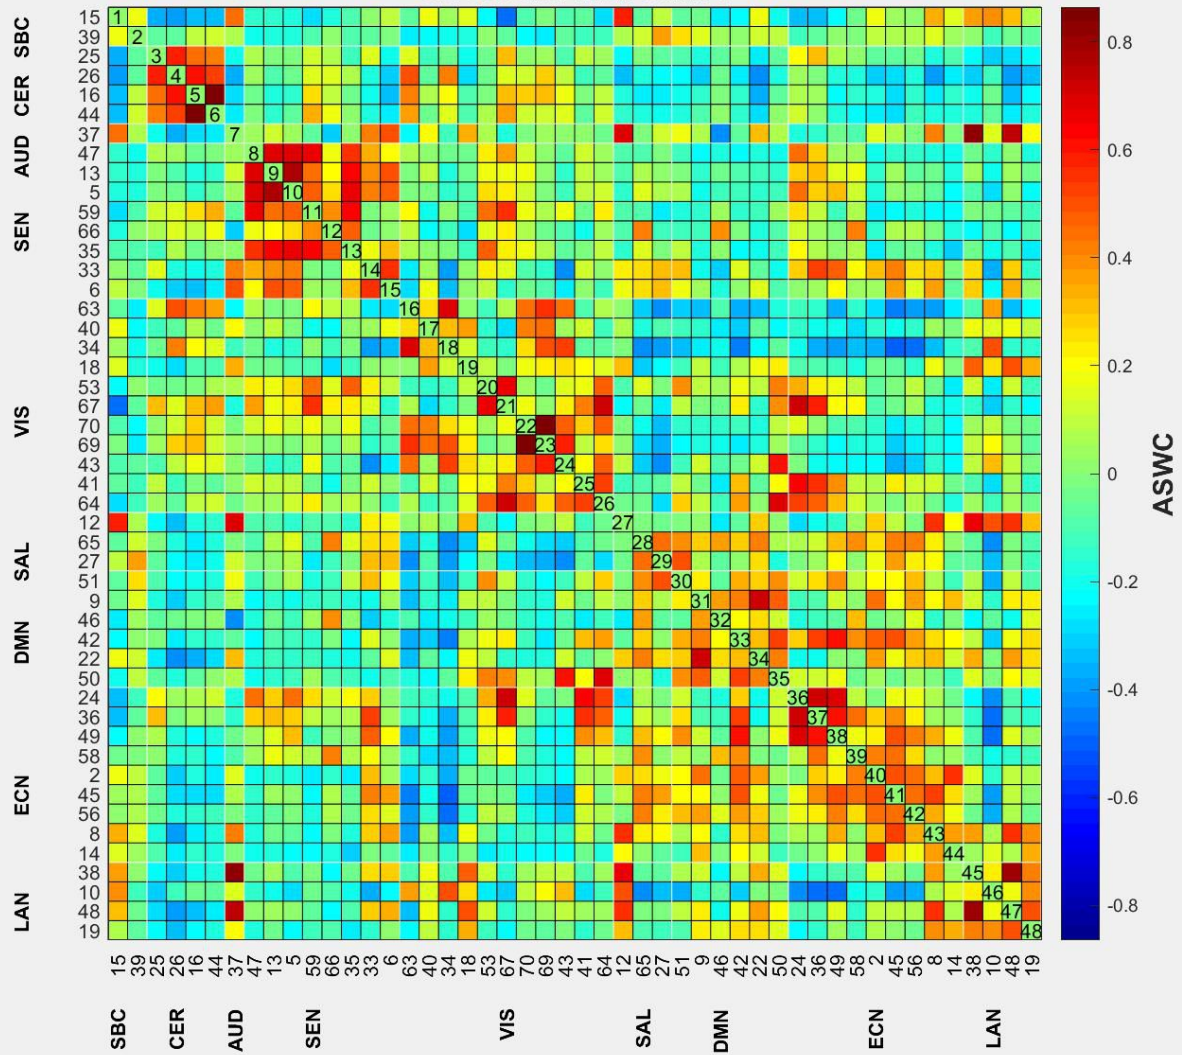





### CR Second Visit State 4

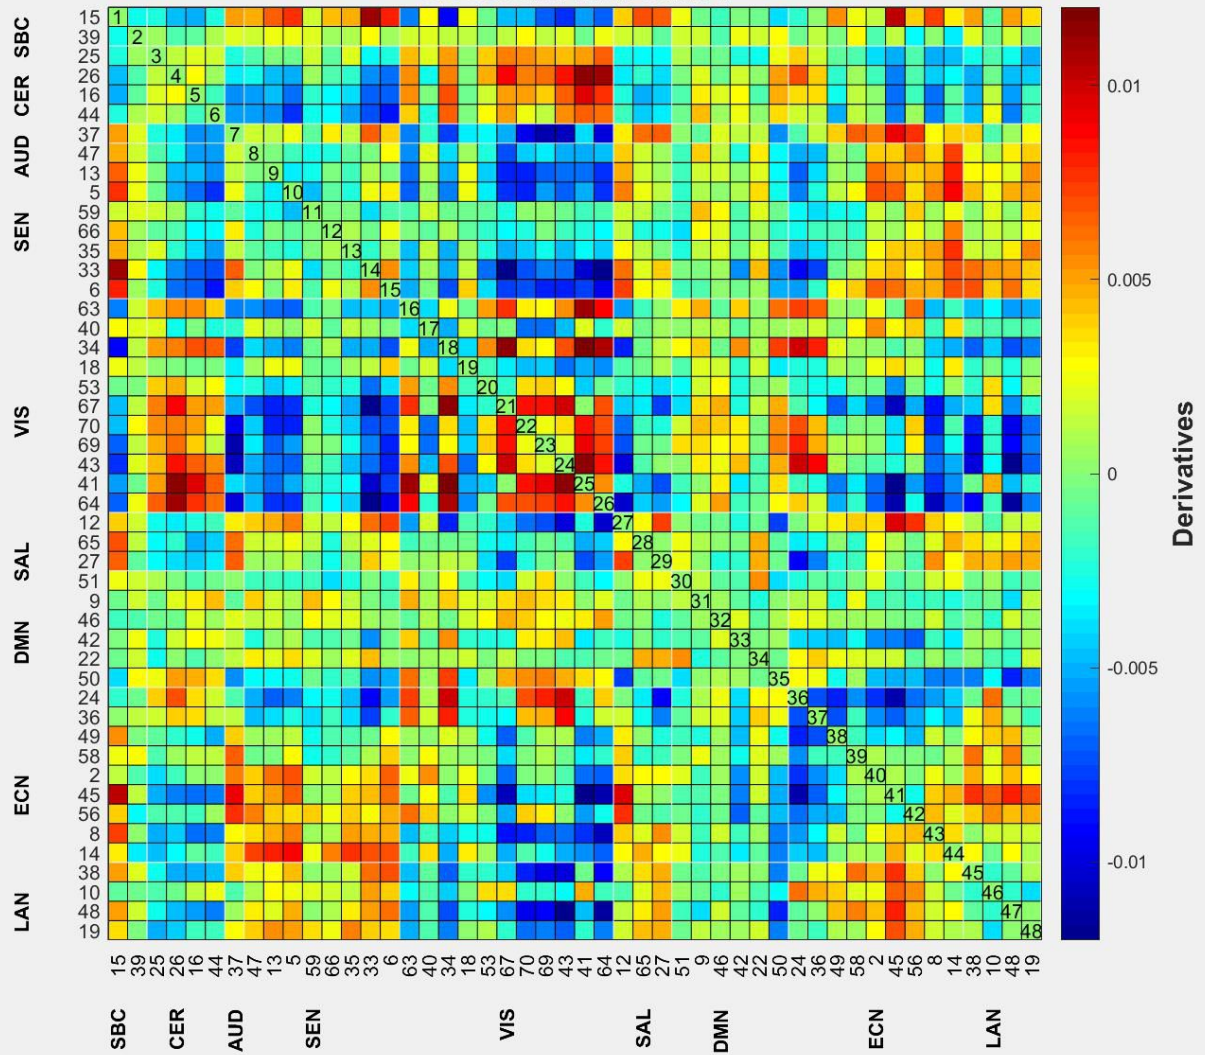





















### HC State 4

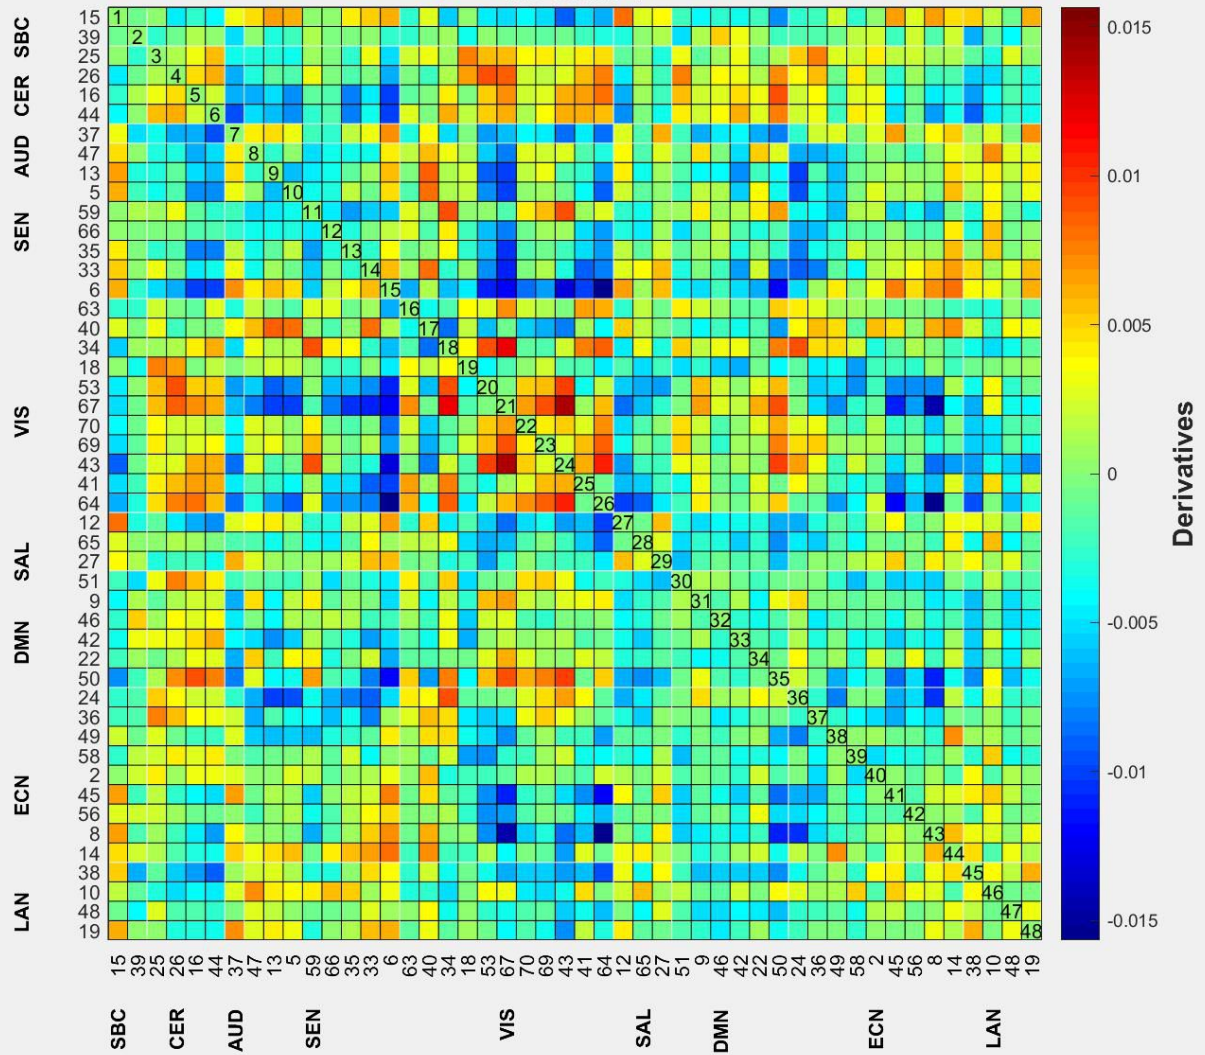

Supplement: HBM-41-617-s003.pdf [file HBM-41-617-s003.pdf]
